1 **Is modular control related to functional outcomes in individuals with knee osteoarthritis**  
2 **and following total knee arthroplasty?**

3  
4 Rebekah R. Koehn<sup>1</sup>, Sarah A. Roelker<sup>2</sup>, Xueliang Pan<sup>3</sup>, Laura C. Schmitt<sup>4-6</sup>, Ajit M.W.  
5 Chaudhari<sup>1,4-8</sup>, Robert A. Siston<sup>1,4,5,7,8\*</sup>

6  
7 <sup>1</sup>Department of Mechanical and Aerospace Engineering, The Ohio State University, Columbus,  
8 Ohio, United States of America

9  
10 <sup>2</sup>Department of Kinesiology, University of Massachusetts Amherst, Amherst, Massachusetts,  
11 United States of America

12  
13 <sup>3</sup>Center for Biostatistics and Bioinformatics, The Ohio State University, Columbus, Ohio, United  
14 States of America

15  
16 <sup>4</sup>School of Health and Rehabilitation Sciences, The Ohio State University, Columbus, Ohio,  
17 United States of America

18  
19 <sup>5</sup>Sports Medicine Research Institute, The Ohio State University Wexner Medical Center,  
20 Columbus, Ohio, United States of America

21  
22 <sup>6</sup>Division of Physical Therapy, School of Health and Rehabilitation Sciences, The Ohio State  
23 University, Columbus, Ohio, United States of America

24  
25 <sup>7</sup>Department of Biomedical Engineering, The Ohio State University, Columbus, Ohio, United  
26 States of America

27  
28 <sup>8</sup>Department of Orthopaedics, The Ohio State University, Columbus, Ohio, United States of  
29 America

30  
31 \*Corresponding author

32 Email: [siston.1@osu.edu](mailto:siston.1@osu.edu) (RAS)

33 **Author Contributions:**

34 RK: Conceptualization, Data Curation, Formal Analysis, Investigation, Methodology, Software,  
35 Visualization, Writing – Original Draft Preparation

36 SR: Conceptualization, Data Curation, Formal Analysis, Methodology, Software, Writing –  
37 Review & Editing

38 XP: Conceptualization, Formal Analysis, Funding Acquisition, Software, Writing – Review &  
39 Editing

40 LS: Conceptualization, Funding Acquisition, Methodology, Writing – Review & Editing  
41 AC: Conceptualization, Funding Acquisition, Methodology, Resources, Writing – Review &  
42 Editing  
43 RS: Conceptualization, Formal Analysis, Funding Acquisition, Investigation, Methodology,  
44 Project Administration, Resources, Supervision, Writing – Review & Editing  
45  
46

47 **Key Words:**

48 total knee arthroplasty, motor control, gait, muscle synergy, non-negative matrix factorization,  
49 electromyography  
50

51  
52 **Short Title:**

53 Modular Control and Function Before and After TKA  
54  
55

56 **Funding statement:**

57 This research was supported by the National Science Foundation Graduate Research Fellowship  
58 Program (<https://www.nsfgrfp.org/>) under Grant Nos. DGE-1343012 (SAR) and DGE-0822215  
59 (EJC), a fellowship from The Ohio State University (RRK; <https://gradsch.osu.edu/fellowships>),  
60 and by Grant Number R01AR056700 from the National Institute of Arthritis and Musculoskeletal  
61 and Skin Diseases (<https://www-niams-nih-gov.proxy.lib.ohio-state.edu/>). The content is solely  
62 the responsibility of the authors and does not necessarily represent the official views of the  
63 National Institute of Arthritis and Musculoskeletal and Skin Diseases nor the National Institutes  
64 of Health. The funders had no role in study design, data collection and analysis, decision to publish,  
65 or preparation of the manuscript.  
66

67  
68 **Conflict of interest statement:**

69 None of the authors have conflicts of interest regarding the contents of this manuscript.  
70  
71

72 **Data availability statement:**

73 Data are available on Figshare.  
74

75 Demographics data for all participants (.csv) and raw EMG, marker, and force plate data (.mat)  
76 for the participants before and after total knee arthroplasty are available at:

77 [https://figshare.com/projects/Is\\_modular\\_control\\_related\\_to\\_functional\\_outcomes\\_in\\_individuals\\_with\\_knee\\_osteoarthritis\\_and\\_following\\_total\\_knee\\_arthroplasty\\_/132959](https://figshare.com/projects/Is_modular_control_related_to_functional_outcomes_in_individuals_with_knee_osteoarthritis_and_following_total_knee_arthroplasty_/132959)  
78

79  
80 Raw EMG, marker, and force plate data (.mat) for the healthy participants are available at:

81 [https://figshare.com/projects/Modular\\_Control\\_of\\_Walking\\_in\\_Unimpaired\\_Younger\\_and\\_Older\\_Adults\\_and\\_Individuals\\_with\\_Knee\\_Osteoarthritis/128774](https://figshare.com/projects/Modular_Control_of_Walking_in_Unimpaired_Younger_and_Older_Adults_and_Individuals_with_Knee_Osteoarthritis/128774)  
82  
83

## 84 **Abstract**

85           **Background:** Individuals who undergo total knee arthroplasty (TKA) for treatment of knee  
86 osteoarthritis often experience suboptimal outcomes. Investigation of neuromuscular control  
87 strategies in these individuals may reveal factors that contribute to these functional deficits. The  
88 purpose of this pilot study was to determine the relationship between patient function and modular  
89 control during gait before and after TKA. **Methods:** Electromyography data from 36 participants  
90 (38 knees) were collected from 8 lower extremity muscles on the TKA-involved limb during  $\geq 5$   
91 over-ground walking trials before (n=30), 6-months after (n=26), and 24-months after (n=13)  
92 surgery. Muscle modules were estimated using non-negative matrix factorization. The number of  
93 modules was determined from 500 resampled trials. **Results:** A higher number of modules was  
94 related to better performance-based and patient-reported function before and 6-months after  
95 surgery. Participants with organization similar to healthy, age-matched controls trended toward  
96 better function 24-months after surgery, though these results were not statistically significant. We  
97 also observed plasticity in the participants' modular control strategies, with 100% of participants  
98 who were present before and 24-months after surgery (10/10) demonstrating changes in the  
99 number of modules and/or organization of at least 1 module. **Conclusions:** This pilot work  
100 suggests that functional improvements following TKA may initially present as increases in the  
101 number of modules recruited during gait. Subsequent improvements in function may present as  
102 improved module organization. **Noteworthy:** This work is the first to characterize motor modules  
103 in TKA both before and after surgery and to demonstrate changes in the number and organization  
104 of modules over the time course of recovery, which may be related to changes in patient function.  
105 The plasticity of modular control following TKA is a key finding which has not been previously

106 documented and may be useful in predicting or improving surgical outcomes through novel  
107 rehabilitation protocols.

## 108 **Introduction**

109           Total knee arthroplasty (TKA) is the definitive end-stage treatment for knee osteoarthritis  
110 (KOA), with over 750,000 primary TKAs occurring in 2014 and over 1.25 million primary TKAs  
111 expected in the U.S. annually by 2030 (1). While TKA improves function in most patients, more  
112 than 20% of adults demonstrate functional deficits 2-years post-TKA (2). These functional deficits  
113 include slower walking speeds (3), stiff-knee gait (4), and difficulty in stair descent (5) and sit-to-  
114 stand transfer (6). Several studies have suggested that these deficits are influenced by a variety of  
115 factors including implant design (7), surgical technique (8), ligament laxity and soft tissue balance  
116 (9), quadriceps strength (10), strength of the non-operated limb (11), and preoperative conditions  
117 (12). However, the primary factor or combination of factors which reliably predict patient  
118 outcomes has yet to be determined.

119           Several studies have also examined neuromuscular control as a factor which may explain  
120 the functional deficits seen in this population. One study found that TKA patients, both before and  
121 1-month after surgery, demonstrated higher co-activation of the quadriceps and hamstrings during  
122 stand-to-sit transfer and performed the five-times-sit-to-stand task more slowly than healthy adults  
123 (13). Another study determined that TKA patients demonstrated quadriceps muscle activation  
124 deficits after surgery, but these deficits were not associated with quadriceps strength 3-months  
125 after TKA (14). Some work has also been done to investigate changes in patient function and  
126 neural control in this population from the preoperative to postoperative condition. Hubley-Kozey  
127 et al. (15) studied patient function and muscle activation patterns in patients before and 1-year  
128 following TKA and found that while functional improvements were accompanied by shifts in  
129 activation patterns toward the patterns of asymptomatic individuals, the patterns were still  
130 statistically different from the asymptomatic individuals. While these studies provide valuable

131 insight into the influence of activation patterns on function in KOA and TKA, it is still unknown  
132 how these electromyography (EMG)-measured factors may change over the time course of  
133 recovery after surgery. Further, it remains unclear if changes in co-activations and muscle  
134 activation patterns are indicative of changes in the underlying neuromuscular control strategies.  
135 Since individual EMG waveforms alone do not provide insight into the underlying mechanisms of  
136 control, other tools are necessary in order to determine the influence of neuromuscular control on  
137 patient function.

138         The theory of modular muscle control has gained popularity as a tool to explore  
139 neuromuscular control (16). The theory describes a simplified neural control strategy in which a  
140 group of muscles is activated synergistically by a common neural command, reducing the set of  
141 activation profiles used to complete a motion (17). The number of these commands, or “motor  
142 primitives” (18), and the organization of muscles within the modules, which are selected out of an  
143 individual’s library of possible commands in order to complete a task, represent varying  
144 complexity of control patterns (19-21). A higher number of modules used to complete a task, such  
145 as walking, may indicate a more complex neuromuscular control strategy and greater flexibility in  
146 control (21). Muscles that are organized into a specific module activate as a group according to  
147 the module’s timing profile, and recent literature has suggested that populations with neurologic  
148 movement disorders, including Parkinson’s disease, post-stroke hemiparesis, and incomplete  
149 spinal cord injury, demonstrate altered module organization in comparison to healthy controls (22-  
150 25). Recent literature has also indicated differences in motor modules between healthy adults and  
151 individuals with a variety of musculoskeletal knee conditions, including patellofemoral pain  
152 syndrome (26), anterior cruciate ligament deficiency (27), and KOA (28, 29). To our knowledge,  
153 there has been only one study examining modular control in the TKA population. Ardestani et al.

154 (21) found that 1-year following a cruciate retaining (CR) TKA, a low-functioning group of  
155 participants demonstrated 2-3 motor modules while a high-functioning group demonstrated 4-5  
156 modules, which more closely resembled a healthy control group that demonstrated 5-6 modules.  
157 The results of that study suggest that the complexity of neural control strategy may be an  
158 underlying mechanism that contributes to the large range of post-operative functional outcomes  
159 observed in this population. However, the relationship between module organization and function  
160 has yet to be characterized in the TKA population. Additionally, it has been suggested that  
161 rehabilitation programs may influence the complexity and organization of modular control in  
162 individuals with spinal cord injuries or neurological disorders (22, 30). However, it is still  
163 unknown whether changes in modular control exist in individuals with orthopaedic disorders and  
164 whether such changes may be related to the time course of functional improvements following  
165 surgical interventions, like TKA.

166 Therefore, the purpose of this pilot study was to determine the relationship between patient  
167 function and modular control during gait before and at two timepoints after surgery and to  
168 investigate the plasticity of neuromuscular control in the KOA and TKA populations. We  
169 hypothesized that better patient function before surgery, 6-months after surgery, and 24-months  
170 after surgery would be associated with (I) a higher number of modules and (II) module  
171 organization more similar to that of healthy controls. Additionally, we aimed to examine the  
172 relationship between changes in function and changes in the number and organization of modules  
173 over the time course of recovery from TKA.

174

## 175 **Materials and methods**

### 176 **Data collection**

177 Prior to enrolling in the original longitudinal study (31), 36 individuals (38 knees) with  
178 medial compartment KOA (19/19 R/L) provided written informed consent. All study procedures  
179 were approved by The Ohio State University Institutional Review Board. The cohort in the current  
180 study is a superset of that reported in Freisinger et al. (31), which examined gait biomechanics  
181 before surgery, and Chaudhari et al. (32), which examined muscle strength before and after  
182 surgery. Three orthopaedic surgeons (JFG, AHG, MDB; see acknowledgements) identified  
183 potential participants based on consultation for a TKA at The Ohio State Wexner Medical Center.  
184 Participants were required to have a body-mass index (BMI) less than 45, the ability to walk 20  
185 meters without an assistive device, and no history of previous TKA or osteotomy. Recruitment  
186 began in April 2012 and continued on a rolling basis, and data was collected from May 2012 to  
187 May 2017. All participants were scheduled to undergo a primary posterior-stabilizing (PS) TKA  
188 (Zimmer NexGen LPS Flex Knee) prior to study recruitment. By consensus, two fellowship-  
189 trained musculoskeletal radiologists (JP, AR; see acknowledgements) determined the Kellgren-  
190 Lawrence classification (KL-grade) of each participant's right and left knees (33).

191 The participants were tested in the Clinical, Functional, and Performance Biomechanics  
192 Laboratory at The Ohio State University approximately 1-month before, 6-months after, and 24-  
193 months after undergoing surgery. Each participant performed a minimum of 5 over-ground  
194 walking trials. Surface EMG data were collected at 1,500 Hz (Telemetry DTS System, Noraxon,  
195 Scottsdale, AZ) from 16 pre-gelled Ag/AgCl dual-electrodes (Model A10011, 10.592 mm sensor  
196 diameter, 40 mm inter-electrode distance; Vermed, Buffalo, NY) affixed over the bellies of 8 lower  
197 extremity muscles, bilaterally: rectus femoris, vastus lateralis, vastus medialis, biceps femoris,  
198 medial hamstrings, lateral gastrocnemius, medial gastrocnemius, and soleus. Prior to affixing the  
199 electrodes, the skin over each muscle was shaved to remove any hair and then cleansed and lightly



200 abraded with alcohol wipes. Force plate data were collected at 1,500 Hz and were used to identify  
201 heel-strike-to-heel-strike gait cycle timing. Motion capture data were also collected but were not  
202 used in this study. Details of motion capture collection and analysis can be found in Freisinger et  
203 al. (31).

204 In addition to gait trials, several performance-based and patient-report measures of function  
205 were recorded. Each participant completed three clinical performance-based assessments: the  
206 timed stair-climbing test (SCT) (34), the timed up-and-go test (TUG) (35), and the six-minute walk  
207 test (6MW) (36). Each participant also provided self-reported functional data using four of the  
208 Knee Injury and Osteoarthritis Outcome Score (KOOS) (37) survey subscales: pain, symptoms,  
209 activities of daily living (ADL), and quality of life (QOL). For each question, the participants'  
210 answers were scored on a scale from 0 to 4, with a higher score indicating better self-reported  
211 function. The scores were totaled within each subscale and normalized such that a maximum score  
212 of 100 represented high function and a minimum score of 0 represented poor function.

213 Due to attrition and technical challenges in the original longitudinal study, all participants  
214 were not represented at all three data collection time points. Two participants received a TKA on  
215 both left and right knees and participated in the study twice. Hence 36 participants enrolled, yet 38  
216 knees were included in the study. High BMI (e.g.  $33.9 \pm 5.1$  kg/m<sup>2</sup> before TKA), a common trait  
217 in individuals with osteoarthritis, caused soft tissue motion artifact in the EMG data in many of  
218 the trials. Due to this motion artifact, several trials were excluded from the study. Participants with  
219 fewer than 5 trials of usable EMG data at a particular testing time point were excluded from  
220 analysis at that time point. For these reasons and due to attrition, we were able to include data for  
221 30 participants before surgery, 26 participants at 6-months post-TKA, and 13 participants at 24-  
222 months post-TKA (Table 1) in this pilot study. There were 8 participants with useable data at all

223 three time points. All other participants had useable data at only two time points (11 before and 6-  
224 months after surgery, 2 before and 24-months after surgery, 2 at 6- and 24-months after surgery)  
225 or at only one time point (9 before surgery, 5 at 6-months after surgery, 1 at 24-months after  
226 surgery).

227

## 228 **Identification of muscle modules**

229 We processed the EMG data for the TKA-involved limb from each gait trial to prepare for  
230 module extraction. The EMG data were demeaned and bandpass filtered to frequencies between  
231 50 Hz and 300 Hz (Butterworth, 6<sup>th</sup> order) due to higher levels of motion artifact associated with  
232 high BMI values in this population, as recommended by Kieliba et al. (38) and Santuz et al. (39).  
233 The EMG data were then full-wave rectified and smoothed using a 6 Hz lowpass filter  
234 (Butterworth, 6<sup>th</sup> order). All trials were examined visually, and those with missing channels, gaps  
235 in EMG data, or excessive motion artifact were excluded. We extracted the maximum number of  
236 available gait cycles from each participant, and those with fewer than 5 available gait cycles were  
237 excluded. Linear envelopes were formed by discretizing the data such that each trial contained 201  
238 data points, such that each point corresponds to 0.5% of the gait cycle, concatenating all available  
239 gait cycles, and normalizing each muscle first to the maximum value across all gait cycles and then  
240 to unit variance (40).

241 Muscle modules were calculated using non-negative matrix factorization (NMF) (41).  
242 Given that neuron firing rates and strengths cannot be negative, NMF provides insight into an  
243 individual's neural control strategy that can be interpreted physiologically (16). First, the linear  
244 envelopes for each subject were organized into  $m \times t$  matrices representing the original EMG  
245 ( $EMG_o$ ), where  $m$  is the number of muscles (i.e.  $m = 8$ ) and  $t$  is the number of data points (i.e.  $t =$

246 201 x the number of gait cycles available). The NMFs were performed using the Statistics and  
247 Machine Learning Toolbox in Matlab R2017a (The MathWorks Inc.; Natick, MA) which  
248 populated an  $n \times t$  matrix (Pattern Matrix) and an  $m \times n$  matrix (Weighting Matrix), where  $n$  is the  
249 number of modules. The Pattern Matrix represents the temporal waveform of each module while  
250 the Weighting Matrix represents the weight of each muscle within each of the modules, such that  
251 the product of these matrices ( $EMG_r$ ) reconstructs  $EMG_o$  (Fig 1). The sum of the squared errors  
252 between  $EMG_r$  and  $EMG_o$  was quantified with the percent of variability accounted for (VAF). The  
253 VAF was calculated for each muscle (mVAF) of each solution using:

$$254 \quad mVAF = \left( 1 - \frac{(EMG_{o,m} - EMG_{r,m})^2}{EMG_{o,m}^2} \right) \times 100\% \quad \text{Equation 1}$$

255 and the total VAF (tVAF) for each solution was calculated using:

$$256 \quad tVAF = \left( 1 - \frac{\sum_{m=1}^8 (EMG_{o,m} - EMG_{r,m})^2}{\sum_{m=1}^8 EMG_{o,m}^2} \right) \times 100\% \quad \text{Equation 2}$$

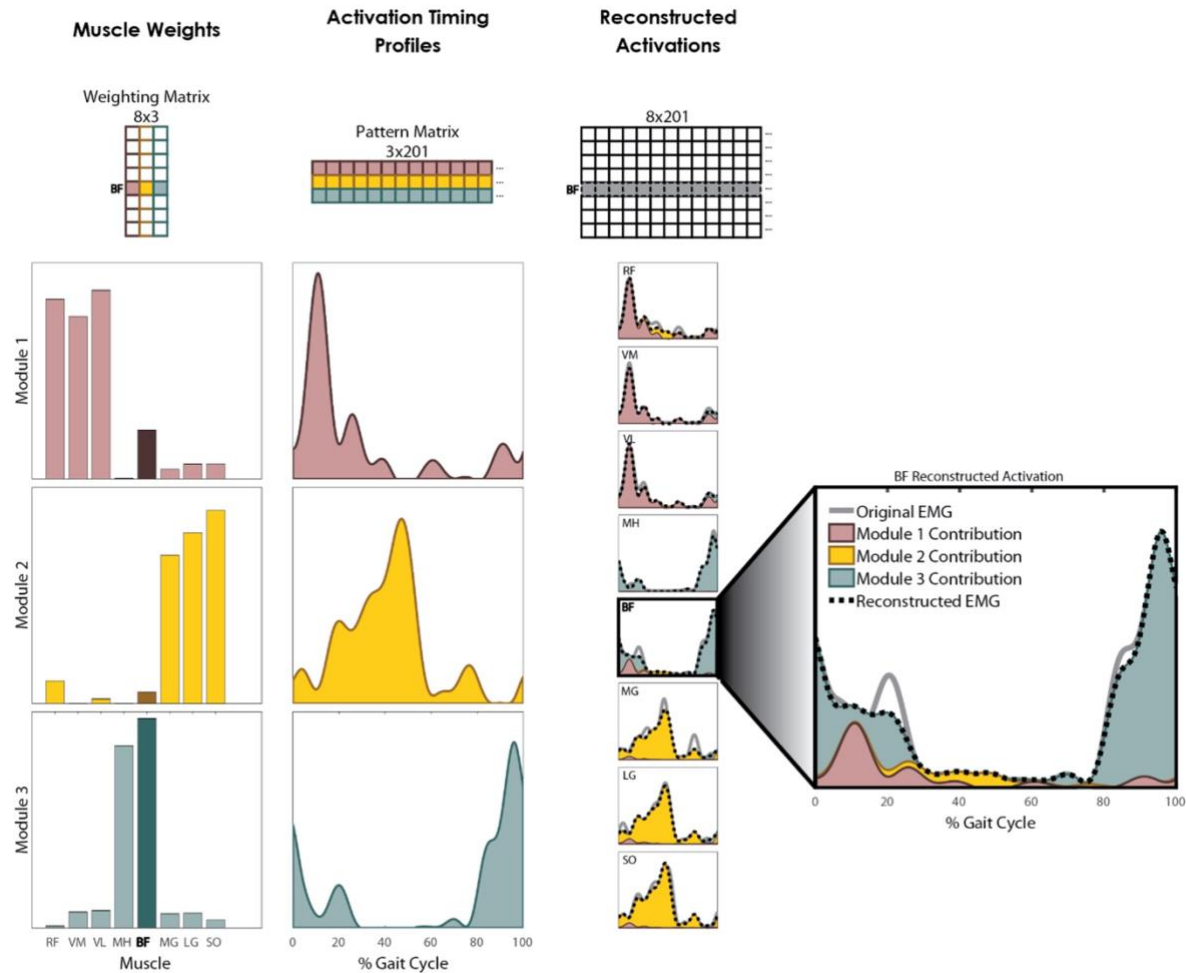

257  
258  
259  
260  
261  
262  
263  
264

**Fig 1. Example of EMG Reconstruction using Non-Negative Matrix Factorization.** Muscle modules were calculated using non-negative matrix factorization (NMF) in which an  $m \times n$  Weighting Matrix is multiplied by an  $n \times t$  Pattern Matrix to reconstruct the EMG patterns in an  $m \times t$  matrix, where  $m$  is the number of muscles (8 in this study),  $n$  is the number of modules (3 in this example), and  $t$  is the number of data points in the trial (201 in this study). The Pattern Matrix represents the timing profile of each module. The Weighting Matrix represents how strongly each muscle is represented in the module. This process is iterated, increasing  $n$  from 1 to  $m$  until the error between the reconstructed EMG (black dotted line) and the original EMG (solid gray line) is reduced to some acceptable level determined by the variability accounted for (VAF) criteria.

265 In order to find the number of modules required to reconstruct  $EMG_o$ , the number of  
266 modules was increased from 1 to  $m$  (i.e.,  $m = 8$ ; the number of muscles recorded) in separate NMFs  
267 with a maximum of 10,000 iterations until the following criteria were satisfied: the lower bound  
268 of the 95% confidence interval (CI) of tVAF was greater than 90% for all muscles and (a) the  
269 minimum lower bound of the 95% CI of all mVAFs was greater than 75%, or (b) the minimum  
270 lower bound of the 95% CI for all mVAFs was greater than 75% and the addition of another  
271 module did not raise the lower bound of the 95% CI for that mVAF by more than 5% of its value  
272 in the previous NMF (24). The 95% CIs of the VAFs were found using a bootstrapping technique  
273 adopted from Allen et al. (22), wherein  $EMG_o$  was resampled 500 times with replacement. The  
274 95% CI was assembled from the VAFs of all 500 bootstrapped samples. Once the appropriate  
275 number of modules was determined, we ran a final NMF on the original EMG using a  
276 multiplicative update algorithm with 50 replicates. To allow for comparison of modules between  
277 participants and timepoints, the Weighting Matrix was normalized to the maximum muscle weight  
278 within that module. Additionally, we evaluated tVAF for all possible module solutions (i.e. 1  
279 module, 2 modules, ..., 8 modules) as a measure of the complexity of the control strategy. A higher  
280 tVAF value for any given module solution represents a better fit between  $EMG_r$  and  $EMG_o$ .  
281 Therefore, a low tVAF value indicates that the solution is not capable of fully capturing the  
282 complexity of the actual control strategy.

283 To characterize modular organization, we adapted definitions of organization  
284 characteristics,  $W_{musc}$  and  $W_{sum}$ , from Hayes et al. (25).  $W_{musc}$  is defined as the number of  
285 significantly active muscles in each module, and  $W_{sum}$  is defined as the sum of the weights of the  
286 significantly active muscles in each module. In Hayes et al. (25) a muscle was considered  
287 significantly active if the 95% CI of weights for the 500 bootstrapped gait cycles did not contain

288 0. However, participants in the current study often had confidence intervals with a lower bound  
289 greater than zero but a very small upper bound. Under the original definition from Hayes et al.  
290 (25), all modules for all participants in the TKA cohort had a  $W_{\text{musc}}$  of 7 or 8, meaning all muscles  
291 were significantly active in all modules. To uncover more subtle differences in  $W_{\text{musc}}$  and  $W_{\text{sum}}$   
292 between participants in our cohort, we adapted the definition of “significantly active,” such that a  
293 muscle was considered significantly active if the 95% CI of weights did not contain 0 and the  
294 upper bound was greater than 0.25. Modules from each of the 500 samples were sorted using a k-  
295 means algorithm to ensure like-modules were grouped prior to determining the 95% CIs for the  
296 weights (42). The significantly active muscles in each module were counted ( $W_{\text{musc}}$ ) and the  
297 weights of these muscles were added ( $W_{\text{sum}}$ ).

298

## 299 **Healthy control group**

300 Motor modules from 10 older adults with no known lower extremity osteoarthritis, a subset  
301 of the cohort used in Roelker et al. (42), were used as healthy, age-matched controls to compare  
302 to the KOA and TKA data. The processes for data collection and identification of muscle modules  
303 are consistent with this study, with the exception of the bandpass filter used to process the EMG  
304 data. Roelker et al. (42) used a 30-300 Hz bandpass filter while we used a 50-300 Hz bandpass  
305 filter in the current study due to the previously mentioned high BMI and resulting motion artifact  
306 observed in the TKA cohort. We determined  $W_{\text{musc}}$  and  $W_{\text{sum}}$  for each module for each healthy  
307 participant based on our new definition for “significantly active” muscles.

308

309

310

## 311 **Comparison of module organization**

312 To determine similarities in module organization between populations, we compared the  
313 module weightings of the study participants to those of the healthy controls. The muscle weights  
314 of each module for each participant at each timepoint were compared to the averaged weights of  
315 healthy age-matched controls with the same number of modules using Pearson correlations. A  
316 critical correlation coefficient of  $\rho \geq 0.834$  was selected based on the number of muscles (8) and  
317 a  $p$ -value of 0.01 (22, 23, 25). A module was considered to have proper organization if its weights  
318 were correlated with the healthy group and its  $W_{\text{musc}}$  and  $W_{\text{sum}}$  values were within the 95% CIs of  
319 the healthy group. Participants were considered to have proper organization if all of their modules  
320 were organized like healthy controls and poor organization if at least one module did not have  
321 healthy organization.

322

## 323 **Clinically meaningful changes in functional performance**

324 Clinically meaningful differences in performance-based and self-reported measures were  
325 evaluated based on minimum detectable changes (MDCs), as defined by previously reported 90%  
326 CIs from representative populations. Improvements were indicated by decreases in the time to  
327 complete SCT ( $\geq 1.9$  seconds; (43)) and TUG ( $\geq 2.49$  seconds; (36)), increases in the distance  
328 walked during 6MW ( $\geq 61.34$  meters; (36)), and increases in all KOOS subscales ( $\geq 10$  points;  
329 (37)).

330

331

332

## 333 **Statistics**

334 To address our hypotheses, we investigated the relationship between functional  
335 performance measures and modules in terms of their number (Hypothesis I) and organization  
336 (Hypothesis II). At each time point, the functional measures were summarized by the number or  
337 organization of modules. Generalized linear mixed models (GLMM) for repeated measures were  
338 used to estimate the effects of number of modules and module organization (proper or poor) on all  
339 functional measures at each time point. Time point, module number/organization, and their  
340 interaction were included as fixed effects and participants were included as random effects in the  
341 GLMMs. GLMMs allowed us to include all participants, even with missing data, assuming data  
342 was missing at random in the analysis.

343 We examined differences in demographics, function, and modules between time points for  
344 the TKA cohort and also examined differences in demographics and number of modules between  
345 the TKA and healthy cohorts. Separate GLMMs were used to estimate the changes over time in  
346 demographics data (height, mass, BMI, self-selected walking speed, stride length normalized to  
347 leg length), performance-based function (SCT, TUG, 6MW), KOOS-subscale scores (Pain,  
348 Symptoms, ADL, QOL), number of modules, and module organization (proper or poor). Separate  
349 unpaired, two-tailed t-tests (all data was normally distributed; Anderson-Darling test for normality,  
350 all  $p \geq 0.052$ ) compared demographics data between the TKA group at 24-months after surgery  
351 and the healthy control group. A Chi-square test compared number of modules between the healthy  
352 control group and the group tested at 24-months post-TKA. As an additional examination of  
353 module complexity, we used GLMMs to estimate differences in tVAF for all possible module  
354 solutions (i.e. 1 to 8 modules) between time points.



355 All GLMMs were performed using Statistical Analysis Software (SAS Institute Inc.; Cary,  
356 NC). Main effects were estimated from the fixed effects parameters or their corresponding contract  
357 of the parameters from the GLMM, and, if significant, pairwise differences were assessed based  
358 on the least squares means difference. All other statistical analysis was performed using Minitab  
359 (Minitab, LLC; State College, PA). A significance level of  $\alpha < 0.05$  was established *a priori* for all  
360 tests.

361

## 362 **Results**

### 363 **Population demographics and modules**

364 The TKA group had statistically significant changes over time in self-selected walking  
365 speed ( $p = 0.001$ ) and BMI ( $p = 0.043$ ; Table 1). Self-selected walking speed increased over time  
366 and was slower before surgery than at 6- (pairwise  $p = 0.007$ ) and 24-months (pairwise  $p < 0.001$ )  
367 after surgery. BMI also increased over time and was higher BMI 24-months after surgery than  
368 before (pairwise  $p = 0.018$ ) or 6-months (pairwise  $p = 0.049$ ) after surgery. Between the TKA  
369 cohort (24-months after surgery) and the healthy age-matched cohort, there were no significant  
370 differences in height, self-selected walking speed, or normalized stride length (all  $p \geq 0.145$ ), but  
371 the TKA group had significantly higher mass ( $p = 0.001$ ) and BMI ( $p < 0.001$ ) than the healthy  
372 group (Table 1).

373 **Table 1. Demographics, Modules, and Function.**

|                  |                                | Patient Population; n = 38 |                                |                                 |                               | Healthy Controls<br>n = 10      |             | Between Populations<br>(t-test or<br>Chi-square test) |                                     |
|------------------|--------------------------------|----------------------------|--------------------------------|---------------------------------|-------------------------------|---------------------------------|-------------|-------------------------------------------------------|-------------------------------------|
|                  |                                | Pre-TKA<br>n = 30          | 6-months<br>Post-TKA<br>n = 26 | 24-months<br>Post-TKA<br>n = 13 | Between Time Points<br>(GLMM) |                                 |             |                                                       |                                     |
|                  |                                |                            |                                |                                 | <i>p</i>                      | F                               | <i>p</i>    | <i>t/X</i> <sup>2</sup>                               |                                     |
| Demographics     | Sex                            | 13M, 17F                   | 9M, 17F                        | 5M, 8F                          | -                             | -                               | 5M, 5F      | -                                                     | -                                   |
|                  | Height (m)                     | 1.70 ± 0.10                | 1.67 ± 0.10                    | 1.69 ± 0.11                     | 0.611                         | F <sub>2,66</sub> = 0.50        | 1.69 ± 0.08 | 0.906                                                 | t <sub>21</sub> = -0.12             |
|                  | Age (y)                        | 59.7 ± 7.8                 | 60.3 ± 7.0                     | 61.9 ± 6.9                      | -                             | -                               | 63.5 ± 3.4  | 0.227                                                 | t <sub>21</sub> = 1.24              |
|                  | Mass (kg)                      | 96.3 ± 18.7                | 96.8 ± 20.3                    | 100.5 ± 20.4                    | 0.124                         | F <sub>2,13</sub> = 2.46        | 71.5 ± 13.5 | <b>0.001</b>                                          | <b>t<sub>21</sub> = -3.72</b>       |
|                  | BMI (kg/m <sup>2</sup> )       | 33.7 ± 5.1                 | 34.0 ± 5.7                     | 35.5 ± 6.4                      | <b>0.043<sup>bc</sup></b>     | <b>F<sub>2,12</sub> = 4.04</b>  | 24.8 ± 2.6  | <b>&lt;0.001</b>                                      | <b>t<sub>21</sub> = -4.56</b>       |
|                  | Walking Speed (m/s)            | 0.97 ± 0.26                | 1.11 ± 0.22                    | 1.22 ± 0.13                     | <b>0.001<sup>ab</sup></b>     | <b>F<sub>2,24</sub> = 9.34</b>  | 1.12 ± 0.18 | 0.145                                                 | t <sub>21</sub> = -1.51             |
|                  | Normalized Stride Length (m/m) | 1.42 ± 0.25                | 1.53 ± 0.24                    | 1.57 ± 0.22                     | 0.056                         | F <sub>2,12</sub> = 3.36        | 1.51 ± 0.16 | 0.248                                                 | t <sub>21</sub> = -1.19             |
| Mods             | Number of Modules              | 2.5 ± 0.6                  | 2.5 ± 0.6                      | 2.5 ± 0.5                       | 0.844                         | F <sub>2,18</sub> = 0.17        | 2.7 ± 0.5   | 0.673                                                 | X <sup>2</sup> <sub>1</sub> = 0.178 |
|                  | Proper Module Organization     | 6 of 30                    | 11 of 26                       | 6 of 13                         | 0.143                         | F <sub>2,19</sub> = 2.15        | -           | -                                                     | -                                   |
| Function Metrics | SCT (s)                        | 25.7 ± 14.6                | 19.5 ± 8.8 <sup>†</sup>        | 18.3 ± 6.8                      | <b>0.049<sup>ab</sup></b>     | <b>F<sub>2,16</sub> = 3.65</b>  | -           | -                                                     | -                                   |
|                  | TUG (s)                        | 11.5 ± 4.4                 | 10.0 ± 1.9                     | 8.8 ± 1.8                       | <b>0.016<sup>ab</sup></b>     | <b>F<sub>2,15</sub> = 5.46</b>  | -           | -                                                     | -                                   |
|                  | 6MW (m)                        | 401.1 ± 106.9              | 457.9 ± 89.0                   | 495.5 ± 78.2                    | <b>0.001<sup>abc</sup></b>    | <b>F<sub>2,17</sub> = 11.28</b> | -           | -                                                     | -                                   |
|                  | KOOS-Pain (pts)                | 48.7 ± 20.4                | 73.7 ± 22.2 <sup>†</sup>       | 79.6 ± 15.5                     | <b>&lt;0.001<sup>ab</sup></b> | <b>F<sub>2,14</sub> = 21.99</b> | -           | -                                                     | -                                   |
|                  | KOOS-Symptoms (pts)            | 46.4 ± 21.2                | 63.6 ± 18.7 <sup>†</sup>       | 72.3 ± 15.9                     | <b>0.006<sup>ab</sup></b>     | <b>F<sub>2,12</sub> = 7.91</b>  | -           | -                                                     | -                                   |
|                  | KOOS-ADL (pts)                 | 55.8 ± 20.8                | 78.2 ± 21.4 <sup>†</sup>       | 80.2 ± 14.1                     | <b>&lt;0.001<sup>ab</sup></b> | <b>F<sub>2,14</sub> = 18.61</b> | -           | -                                                     | -                                   |
|                  | KOOS-QOL (pts)                 | 24.7 ± 21.0                | 54.3 ± 22.2 <sup>†</sup>       | 64.1 ± 24.2                     | <b>&lt;0.001<sup>ab</sup></b> | <b>F<sub>2,10</sub> = 27.51</b> | -           | -                                                     | -                                   |

374 Average demographics, module metrics, and function metrics grouped by time point and population (± 1 standard deviation). The healthy  
375 control group was compared to the group of participants tested at 24-months post-TKA.

376 Symbols indicate differences between: <sup>a</sup>Pre-TKA and 6-months Post-TKA, <sup>b</sup>Pre-TKA and 24-months Post-TKA, <sup>c</sup>6- and 24-months  
377 Post-TKA  
378 † Clinically meaningful improvement in function compared to the previous time point  
379 M = male  
380 F = female  
381

382           Of the 10 healthy individuals, 3 demonstrated 2 modules and 7 demonstrated 3 modules  
383 (2.7 ± 0.5 modules; Table 1). Those with 2 modules had 1 module dominated by the plantarflexors  
384 and 1 module dominated by the quadriceps and hamstrings. Those with 3 modules had modules  
385 dominated by the plantarflexors, quadriceps, and hamstrings, separately. Before surgery, 16  
386 individuals with TKA demonstrated 2 modules and 14 demonstrated 3 modules, and 6 of the 30  
387 (20.0%) participants had proper organization. By 6-months after surgery, 12 demonstrated 2  
388 modules and 14 demonstrated 3 modules, and 11 of the 26 (42.3%) participants had proper module  
389 organization. By 24-months after surgery, 5 participants demonstrated 2 modules and 8  
390 demonstrated 3 modules, and 6 of the 13 (46.2%) participants had proper organization. There was  
391 no difference in number of modules ( $p = 0.844$ ) or module organization ( $p = 0.143$ ) between time  
392 points (Table 1).

393           There were differences in mean tVAF values between time points for solutions with 1, 2,  
394 6, and 7 modules (Fig 2). For the 1-module solution, the group tested before surgery ( $79.8 \pm 6.3\%$ )  
395 had a statistically higher mean tVAF value than those at 6-months ( $75.7 \pm 6.3\%$ ; pairwise  $p =$   
396  $0.001$ ) and 24-months ( $72.9 \pm 8.2\%$ ; pairwise  $p = 0.003$ ) after surgery. For the 2-module solution,  
397 the group tested before surgery ( $91.2 \pm 2.6\%$ ) had a statistically higher mean tVAF than those at  
398 24-months after surgery ( $89.3 \pm 2.7\%$ ; pairwise  $p = 0.033$ ). For the 6-module solution, the group  
399 tested before surgery ( $99.3 \pm 0.3\%$ ) had a statistically higher mean tVAF than those at 24-months  
400 after surgery ( $99.1 \pm 0.3\%$ ; pairwise  $p = 0.016$ ). For the 7-module solution, the group tested before  
401 surgery ( $99.7 \pm 0.1\%$ ) had a statistically higher mean tVAF than those at 6-months ( $99.7 \pm 0.1\%$ ;  
402 pairwise  $p = 0.040$ ) and 24-months ( $99.6 \pm 0.2\%$ ; pairwise  $p = 0.004$ ) after surgery.

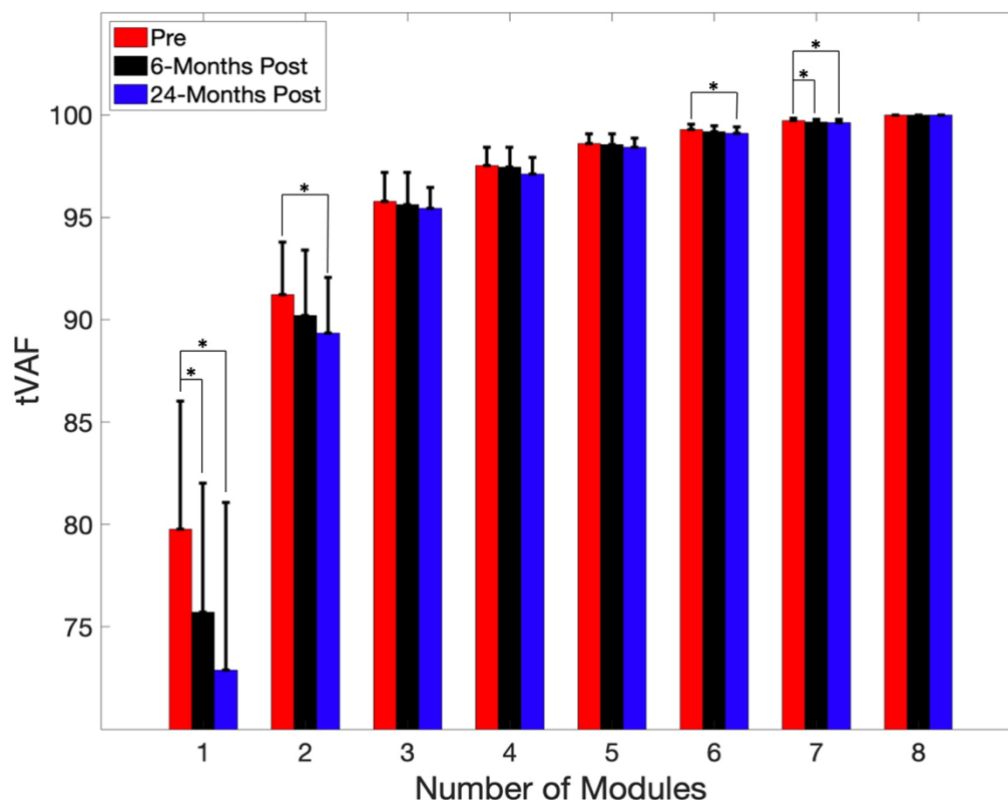

403  
404  
405  
406  
407  
408

**Fig 2. tVAF for All Module Solutions.** Estimated mean tVAF by time point for number of modules varying from 1 to 8. Error bars represent +1 standard deviation. \* indicates statistically significant differences between time points.

409           The worst averaged functional scores were observed before surgery and the best averaged  
410 functional scores were observed 24-months after surgery (Table 1). All measures were statistically  
411 different between timepoints (all  $p \leq 0.049$ ). From before to 6-months after surgery, all measures  
412 had statistically significant improvements (all pairwise  $p \leq 0.031$ ), and these improvements were  
413 also clinically meaningful for the SCT and all KOOS subscales. From before to 24-months after  
414 surgery, all measures had statistically significant (all pairwise  $p \leq 0.020$ ) and clinically meaningful  
415 improvements. Average 6MW distance also had a statistically significantly improvement from 6-  
416 to 24-months after surgery (pairwise  $p = 0.036$ ), but this improvement was not clinically  
417 meaningful.

418

## 419 **Hypothesis I: Function and number of modules**

420           A higher number of modules was associated with better performance in a few performance-  
421 based and patient-reported functional measures before and 6-months after surgery but with poorer  
422 performance in a few functional measures 24-months after surgery (Figs 3 & 4). Before surgery,  
423 participants with 3 modules demonstrated better scores on average than those with 2 modules in  
424 all measures, and this difference was clinically meaningful in all measures except the 6MW  
425 distance (Table 2). These results were statistically significant for the TUG ( $p = 0.002$ ) and KOOS-  
426 Pain ( $p = 0.005$ ) scores and approached significance for the SCT ( $p = 0.060$ ), KOOS-ADL ( $p =$   
427  $0.057$ ), and KOOS-QOL ( $p = 0.065$ ) scores. By 6-months after surgery, participants with 3  
428 modules demonstrated better scores on average than those with 2 modules in all measures except  
429 the KOOS-QOL subscale (Table 2). These differences were clinically meaningful for only the  
430 SCT, which also approached statistical significance ( $p = 0.052$ ) and were statistically significant  
431 but not clinically meaningful for the TUG test ( $p = 0.028$ ). By 24-months after surgery, participants  
432 with 2 modules had better scores on average than those with 3 modules in SCT, 6MW, KOOS-  
433 Symptoms scores (Table 2). These differences were clinically meaningful for the SCT and for the  
434 6MW, which was also statistically significant ( $p = 0.006$ ).

435

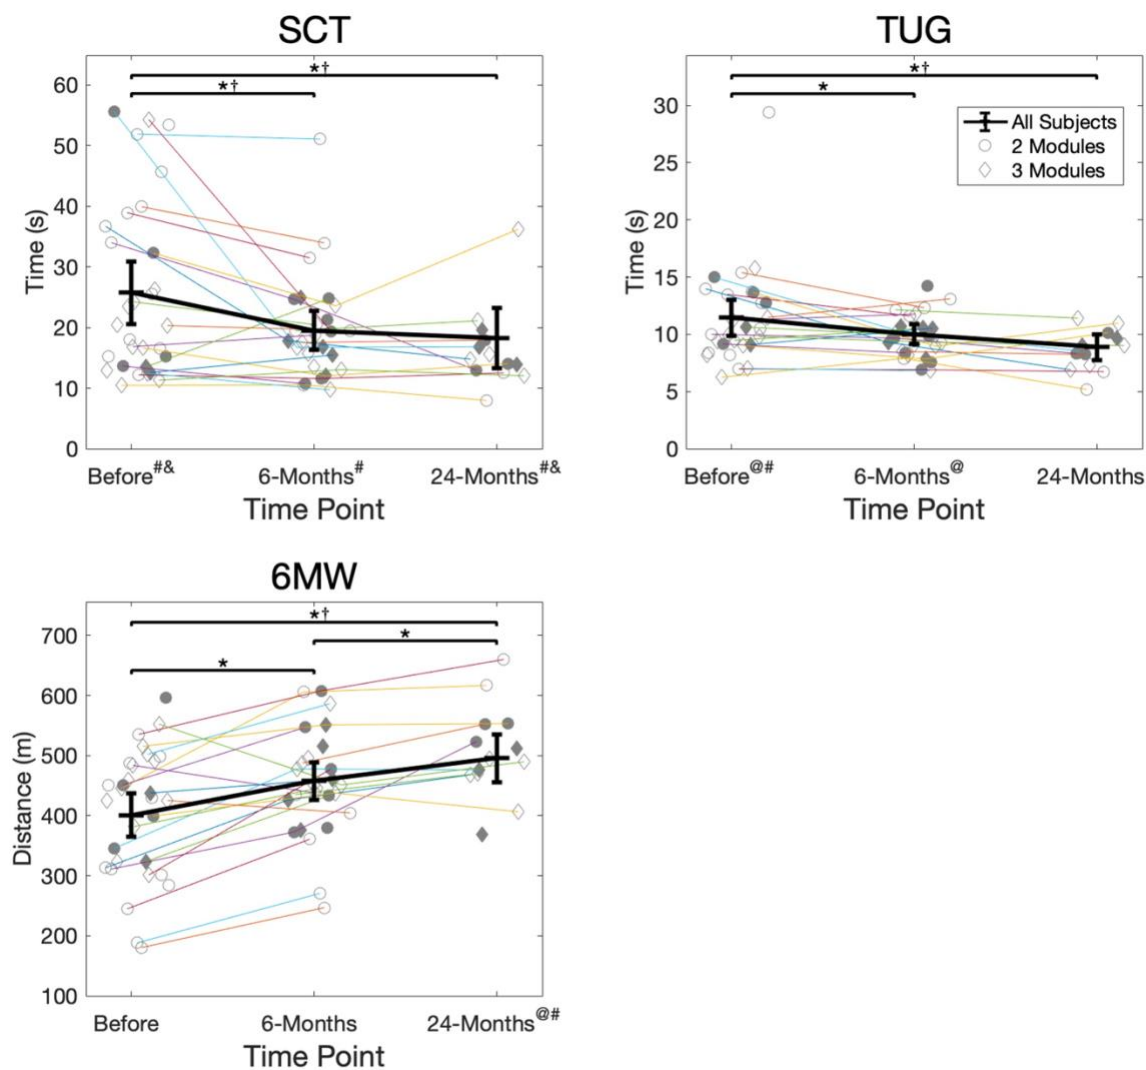

436  
437

438 **Fig 3. Performance-Based Function.** Performance-based functional scores (SCT, TUG, 6MW)  
439 for each participant at each time point. Participants who were present for consecutive testing  
440 time points are connected. Filled symbols indicate participants with proper module organization.  
441 Thick black lines indicate the group estimated means and 95% confidence intervals at each time  
442 point, determined by the GLMM.

443 \*/† = statistically significant (\*) and clinically meaningful (†) differences in function between  
444 time points.

445 @/# = statistically significant (@) and clinically meaningful (#) differences in function between  
446 groups demonstrating the same number of modules at each time point.

447 & = clinically meaningful differences in function between groups demonstrating proper or poor  
448 module organization at each time point. There were no statistically significant differences.

449

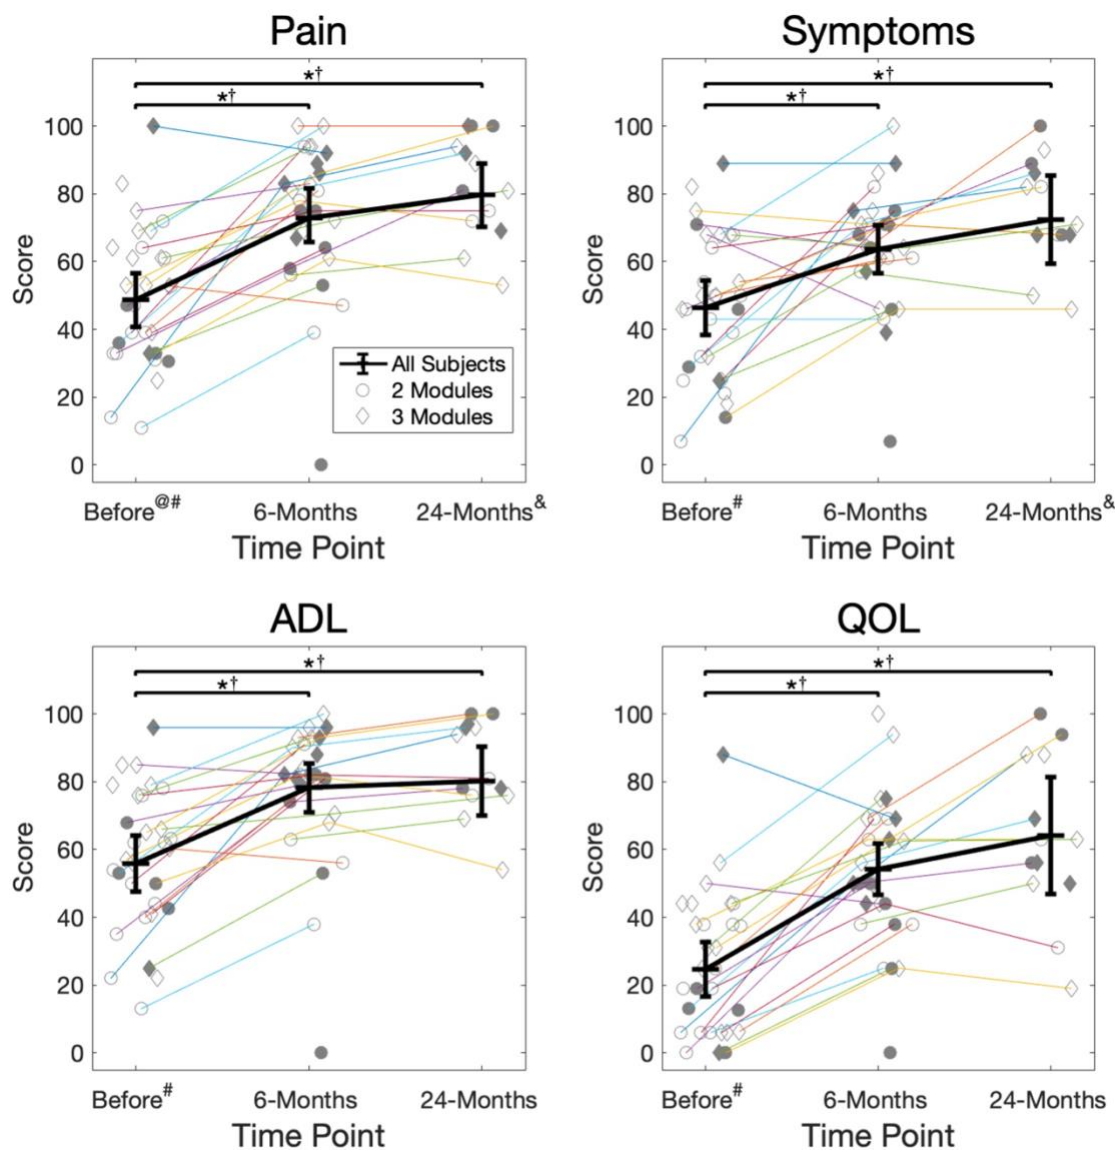

450  
451  
452  
453  
454  
455  
456  
457  
458  
459  
460  
461  
462  
463

**Fig 4. Patient-Reported Function.** KOOS survey subscale scores (Pain, Symptoms, ADL, QOL) for each participant at each time point. Participants who were present for consecutive testing time points are connected. Filled symbols indicate participants with proper module organization. Thick black lines indicate the group estimated means and 95% confidence intervals at each time point, determined by the GLMM. \*/† = statistically significant (\*) and clinically meaningful (†) differences in function between time points. @/# = statistically significant (@) and clinically meaningful (#) differences in function between groups demonstrating the same number of modules at each time point. & = clinically meaningful differences in function between groups demonstrating proper or poor module organization at each time point. There were no statistically significant differences.



464 **Table 2. Functional Measures within Module Number Groups.**

|                       |                    | Two Modules   | Three Modules | <i>p</i>                 | Estimate     | 95% CI                 |
|-----------------------|--------------------|---------------|---------------|--------------------------|--------------|------------------------|
| Number of Subjects    | Pre-TKA            | n = 16        | n = 14        | -                        | -            | -                      |
|                       | 6-months Post-TKA  | n = 12        | n = 14        | -                        | -            | -                      |
|                       | 24-months Post-TKA | n = 5         | n = 8         | -                        | -            | -                      |
| SCT (s)               | Pre-TKA            | 30.2 ± 15.3   | 21.0 ± 11.2   | 0.060 <sup>†</sup>       | 9.2          | [-0.42, 18.90]         |
|                       | 6-months Post-TKA  | 22.5 ± 11.5   | 16.4 ± 4.2    | 0.052 <sup>†</sup>       | 6.1          | [-0.05, 12.19]         |
|                       | 24-months Post-TKA | 16.1 ± 3.6    | 19.5 ± 7.6    | 0.434 <sup>†</sup>       | -3.4         | [-12.44, 5.70]         |
| TUG (s)               | Pre-TKA            | 13.1 ± 5.3    | 9.6 ± 2.3     | <b>0.002<sup>†</sup></b> | <b>3.5</b>   | <b>[1.63, 5.35]</b>    |
|                       | 6-months Post-TKA  | 10.8 ± 2.5    | 9.4 ± 1.4     | <b>0.028</b>             | <b>1.4</b>   | <b>[0.17, 2.60]</b>    |
|                       | 24-months Post-TKA | 9.2 ± 1.9     | 8.9 ± 1.6     | 0.803                    | 0.3          | [-2.51, 3.16]          |
| 6MW (m)               | Pre-TKA            | 379.7 ± 123.8 | 425.9 ± 76.8  | 0.128                    | -46.7        | [-107.79, 14.49]       |
|                       | 6-months Post-TKA  | 453.8 ± 116.3 | 467.9 ± 53.7  | 0.621                    | -13.1        | [-67.74, 41.44]        |
|                       | 24-months Post-TKA | 546.1 ± 55.7  | 468.4 ± 48.4  | <b>0.006<sup>†</sup></b> | <b>78.5</b>  | <b>[29.27, 127.72]</b> |
| KOOS-Pain (points)    | Pre-TKA            | 39.2 ± 16.6   | 58.8 ± 19.8   | <b>0.005<sup>†</sup></b> | <b>-19.6</b> | <b>[-32.58, -6.57]</b> |
|                       | 6-months Post-TKA  | 69.8 ± 24.6   | 78.3 ± 12.4   | 0.186                    | -8.6         | [-21.82, 4.67]         |
|                       | 24-months Post-TKA | 80.6 ± 13.5   | 80.7 ± 17.0   | 0.987                    | -0.1         | [-19.98, 19.68]        |
| KOOS-Symptom (points) | Pre-TKA            | 40.3 ± 18.8   | 52.4 ± 22.5   | 0.152 <sup>†</sup>       | -12.1        | [-28.94, 4.72]         |
|                       | 6-months Post-TKA  | 60.5 ± 19.8   | 67.1 ± 17.3   | 0.393                    | -6.6         | [-22.92, 9.71]         |
|                       | 24-months Post-TKA | 79.0 ± 13.8   | 69.2 ± 16.5   | 0.418                    | 9.7          | [-15.79, 35.26]        |
| KOOS-ADL (points)     | Pre-TKA            | 49.1 ± 17.9   | 63.0 ± 22.3   | 0.057 <sup>†</sup>       | -13.9        | [-28.17, 0.46]         |
|                       | 6-months Post-TKA  | 76.4 ± 25.6   | 80.0 ± 9.5    | 0.482                    | -3.6         | [-15.35, 8.08]         |
|                       | 24-months Post-TKA | 77.8 ± 12.0   | 83.2 ± 15.9   | 0.520                    | -5.4         | [-23.85, 12.98]        |

|                      |                    |             |             |                    |       |                 |
|----------------------|--------------------|-------------|-------------|--------------------|-------|-----------------|
| KOOS-QOL<br>(points) | Pre-TKA            | 17.7 ± 15.0 | 32.3 ± 24.1 | 0.065 <sup>†</sup> | -14.7 | [-30.49, 1.16]  |
|                      | 6-months Post-TKA  | 57.2 ± 20.0 | 53.1 ± 20.1 | 0.515              | 4.1   | [-9.36, 17.55]  |
|                      | 24-months Post-TKA | 61.7 ± 28.4 | 64.8 ± 22.5 | 0.832              | -3.1  | [-34.98, 28.69] |

465

466 Average functional measures within groups of participants demonstrating the same number of modules at each timepoint (estimated  
467 mean ± 1 standard deviation).

468 <sup>†</sup> Clinically meaningful difference in function between the Two Modules and Three Modules groups

469

## 470 **Hypothesis II: Function and module organization**

471 Better module organization was not statistically associated with better performance-based  
472 function (SCT, TUG, or 6MW) or patient-reported function (KOOS subscales) before or after  
473 surgery (Figs 3 & 4). However, the largest differences in function between the proper and poor  
474 organization groups occurred 24-months after surgery, with the proper organization group  
475 demonstrating better function on average in all performance-based and patient-reported measures  
476 (Table 3). These results approached statistical significance for the KOOS-Pain subscale ( $p = 0.061$ )  
477 and were clinically meaningful for the SCT, KOOS-Pain, and KOOS-Symptoms scores.

478

**Table 3. Functional Measures within Module Organization Groups.**

|                       |                    | Poor          | Proper       | p-Value            | Estimate | 95% CI          |
|-----------------------|--------------------|---------------|--------------|--------------------|----------|-----------------|
| Number of Subjects    | Pre-TKA            | n = 24        | n = 6        | -                  | -        | -               |
|                       | 6-months Post-TKA  | n = 15        | n = 11       | -                  | -        | -               |
|                       | 24-months Post-TKA | n = 7         | n = 6        | -                  | -        | -               |
| SCT (s)               | Pre-TKA            | 26.1 ± 14.2   | 24.2 ± 17.3  | 0.750 <sup>†</sup> | 2.0      | [-10.64, 14.60] |
|                       | 6-months Post-TKA  | 19.9 ± 10.7   | 19.1 ± 5.4   | 0.824              | 0.7      | [-6.39, 7.88]   |
|                       | 24-months Post-TKA | 19.6 ± 9.3    | 16.2 ± 2.6   | 0.487 <sup>†</sup> | 3.4      | [-7.06, 13.93]  |
| TUG (s)               | Pre-TKA            | 11.3 ± 4.8    | 12.0 ± 2.5   | 0.695              | -0.6     | [-4.04, 2.78]   |
|                       | 6-months Post-TKA  | 10.2 ± 1.9    | 9.8 ± 2.0    | 0.679              | 0.3      | [-1.25, 1.88]   |
|                       | 24-months Post-TKA | 8.5 ± 2.3     | 9.2 ± 0.8    | 0.540              | -0.7     | [-3.11, 1.72]   |
| 6MW (m)               | Pre-TKA            | 401.6 ± 110.3 | 399.9 ± 97.4 | 0.963              | 1.7      | [-75.03, 78.46] |
|                       | 6-months Post-TKA  | 454.4 ± 96.2  | 462.2 ± 79.6 | 0.762              | -7.7     | [-60.33, 44.85] |
|                       | 24-months Post-TKA | 489.3 ± 89.8  | 502.0 ± 69.3 | 0.727              | -12.7    | [-92.51, 67.11] |
| KOOS-Pain (points)    | Pre-TKA            | 49.5 ± 19.2   | 46.4 ± 26.8  | 0.729              | 3.2      | [-15.41, 21.74] |
|                       | 6-months Post-TKA  | 77.3 ± 19.1   | 68.1 ± 25.7  | 0.116              | 9.2      | [-2.75, 21.19]  |
|                       | 24-months Post-TKA | 75.2 ± 14.6   | 86.1 ± 12.8  | 0.061 <sup>†</sup> | -11.0    | [-22.53, 0.60]  |
| KOOS-Symptom (points) | Pre-TKA            | 46.8 ± 19.6   | 45.7 ± 29.1  | 0.920              | 1.1      | [-20.41, 22.54] |
|                       | 6-months Post-TKA  | 63.4 ± 15.7   | 63.4 ± 22.5  | 0.999              | 0.0      | [-18.11, 18.09] |
|                       | 24-months Post-TKA | 67.3 ± 17.3   | 79.1 ± 13.8  | 0.315 <sup>†</sup> | -11.8    | [-36.93, 13.40] |
| KOOS-ADL (points)     | Pre-TKA            | 56.1 ± 20.4   | 55.9 ± 24.2  | 0.984              | 0.2      | [-18.51, 18.88] |
|                       | 6-months Post-TKA  | 79.2 ± 17.1   | 76.6 ± 26.8  | 0.641              | 2.6      | [-10.72, 15.97] |
|                       | 24-months Post-TKA | 78.7 ± 14.5   | 83.9 ± 10.6  | 0.478              | -5.2     | [-21.13, 10.70] |

|                      |                    |             |             |       |      |                 |
|----------------------|--------------------|-------------|-------------|-------|------|-----------------|
| KOOS-QOL<br>(points) | Pre-TKA            | 24.4 ± 17.7 | 27.5 ± 33.2 | 0.756 | -3.0 | [-23.10, 17.01] |
|                      | 6-months Post-TKA  | 56.8 ± 22.4 | 50.5 ± 20.8 | 0.355 | 6.3  | [-9.43, 21.97]  |
|                      | 24-months Post-TKA | 63.2 ± 26.3 | 67.7 ± 21.3 | 0.759 | -4.5 | [-36.12, 27.19] |

481

482 Average functional measures within groups of participants with modules that were (Proper) or were not (Poor) organized like healthy  
483 controls at each timepoint (estimated mean ± 1 standard deviation).

484 † Clinically meaningful difference in function between the Proper and Poor organization groups

## 485 Secondary analysis: Changes in modules

486 While there were no significant differences in modules between participants grouped by  
 487 time point, we observed changes in module number and organization in individual participants  
 488 throughout the time course of recovery (Table 4). From before to 6-months after surgery, 63.2%  
 489 of participants present at both time points (12/19) demonstrated changes in module number and/or  
 490 organization. From 6- to 24-months after surgery, 80.0% of participants present at both time points  
 491 (8/10) demonstrated changes in module number and/or organization. From before to 24-months  
 492 after surgery, 100% of participants present at both time points (10/10) demonstrated changes in  
 493 module number and/or the organization of at least 1 module (Table 4).

494

495 **Table 4. Count of Participants with Changes in Modules.**

496

|                                 |           | Pre-TKA to<br>6-m Post-TKA<br>n = 19 | 6-m to 24-m<br>Post-TKA<br>n = 10 | Pre-TKA to<br>24-m Post-TKA<br>n = 10 |
|---------------------------------|-----------|--------------------------------------|-----------------------------------|---------------------------------------|
| Number of<br>Modules            | Increase  | 3 (15.8%)                            | 1 (10.0%)                         | 4 (40.0%)                             |
|                                 | No Change | 12 (63.2%)                           | 7 (70.0%)                         | 4 (40.0%)                             |
|                                 | Decrease  | 4 (21.1%)                            | 2 (20.0%)                         | 2 (20.0%)                             |
| Proper vs. Poor<br>Organization | Improved  | 5 (26.3%)                            | 2 (20.0%)                         | 4 (40.0%)                             |
|                                 | No Change | 12 (63.2%)                           | 6 (60.0%)                         | 5 (50.0%)                             |
|                                 | Worsened  | 2 (10.5%)                            | 2 (20.0%)                         | 1 (10.0%)                             |
| Any Module<br>Characteristic    | Change    | 12 (63.2%)                           | 8 (80.0%)                         | 10 (100.0%)                           |
|                                 | No Change | 7 (36.8%)                            | 2 (20.0%)                         | 0 (0.0%)                              |

497

498 Number of participants (%) that were present at multiple time points and demonstrated changes  
 499 in module characteristics. Proper organization describes participants whose organization matched  
 500 those of healthy controls for all modules. Poor organization describes participants with at least 1  
 501 module that was not organized like healthy controls. Participants listed as having a change in  
 502 “Any Module Characteristic” had a change in the number of modules and/or the organization of  
 503 at least 1 module compared to healthy controls.

504

505

## 506 **Discussion**

507           In an effort to identify neuromuscular control strategy as a factor related to functional  
508 deficits in individuals after TKA, the purpose of this study was to determine the relationship  
509 between modular control strategy and function in individuals before and at two time points after  
510 TKA. Our findings partially confirmed our first hypothesis that better function would be related to  
511 a higher number of modules. We found that participants with better performance-based function  
512 before and 6-months after surgery and better patient-reported function before surgery had a higher  
513 number of modules. However, at 24-months after surgery, a higher number of modules were  
514 related to worse 6MW performance, which contradicts our first hypothesis. Our findings did not  
515 strongly confirm our second hypothesis that better function would be related to module  
516 organization that more closely resembled that of healthy controls. However, by 24-months after  
517 surgery, participants with proper module organization had better function on average than those  
518 with poor organization in all performance-based and patient-reported measures, with some  
519 differences being clinically meaningful. Considerable participant drop-out by the 24-month time  
520 point may have prevented us from detecting statistically significant differences in function  
521 between groups demonstrating proper and poor module organization. While we did not find  
522 differences in population-averaged modular control between timepoints, we did observe changes  
523 in both module number and organization in individuals and in population-mean complexity, as  
524 measured by tVAF. While the number of motor modules is often used as a measure of  
525 neuromuscular control complexity, complexity has also been quantified using tVAF values in  
526 previous literature (44-46). Given that all participants demonstrated only 2 or 3 modules in the  
527 current study, tVAF provided greater resolution to investigate changes in control complexity over  
528 time. While the differences in tVAF between testing time points were statistically significant for

529 the 6- and 7-module solutions, they were likely not clinically meaningful, though a clinically  
530 meaningful difference in tVAF values has not been established in the literature. Larger differences  
531 in tVAF between time points were observed for the 1- and 2-module solutions, which may indicate  
532 that module complexity is malleable in this population. Together with our observations on module  
533 organization, these results indicate that motor modules are plastic and suggest that neural control  
534 strategy is influenced by surgical intervention and rehabilitation in this population.

535 This study was motivated by previous work which has found that a higher number of  
536 modules is related to better function (21, 24, 25) and by our own previous work (29) where we  
537 observed decreases in the number of modules in healthy older adults and older adults with knee  
538 osteoarthritis (KOA) compared to healthy younger adults. In all of these studies, healthy older  
539 adults have been found to demonstrate a range in the number of motor modules, from as low as 2  
540 to as high as 6, depending on the extraction method and EMG sensor pattern (21, 24, 25, 29) . In  
541 the current study, we used the healthy subjects from Roelker et al. (29) for direct comparison of  
542 the number of modules between individuals with TKA and healthy adults using the same module  
543 extraction methods and experimental configuration. In Roelker et al. (29), we observed that  
544 healthy older adults demonstrated only 2 or 3 modules despite demonstrating similar self-selected  
545 walking speed to healthy younger adults, who demonstrated up to 4 modules. Given that there  
546 were no differences in self-selected walking speed between the healthy younger and healthy older  
547 adults, we believe this healthy older adult cohort was a suitable control group for the current study.

548 The association we observed between number of modules and function partially confirms  
549 the findings of Ardestani et al. (21), who found that a higher number of modules was associated  
550 with better patient-reported function 1-year following TKA. While we found that better function  
551 was associated with a higher number of modules in individuals with KOA prior to TKA, we did



552 not find this association by 24-months after surgery. Several methodological differences exist  
553 between the current study and Ardestani et al. (21) which may explain the differences in results.  
554 Ardestani et al. (21) measured patient-reported function using the Knee Functional Survey (KFS)  
555 (47), which assesses general patient satisfaction and symptoms, ability to complete activities of  
556 daily living, and ability to participate in sports and exercise. The KFS may most closely relate to  
557 the KOOS-Symptoms, KOOS-ADL, and KOOS-QOL subscales, which were not statistically  
558 related to number of modules in the current study. However, our small sample sizes, particularly  
559 by 24-months after surgery, may have prevented us from detecting associations between patient-  
560 reported function and number of modules after surgery. Additionally, the methods for module  
561 extraction used by Ardestani et al. (21), including a strict error criterion of 90% accuracy between  
562 the experimental and reconstructed EMG, resulted in a range of 2-5 modules, whereas we saw only  
563 2-3 modules. We believe our approach for calculating modules using 500 bootstrapped samples  
564 (48) and a previously developed, conservative VAF criteria (24) is robust. Lastly, participants in  
565 Ardestani et al. (21) received cruciate-retaining implants while participants in the current study  
566 received posterior-stabilizing implants. The comparison of our results with those of Ardestani et  
567 al. (21) may suggest that proprioceptive inputs, which are lost as a result of sacrificing the cruciate  
568 ligaments, influence neuromuscular control strategy. However, the lack of consistency in  
569 methodologies across studies warrants further investigation into the influence of retaining the  
570 posterior cruciate ligament on post-surgical neuromuscular control. Further, while Ardestani et al.  
571 (21) indicated an association between a higher number of modules and better patient-reported  
572 function at 1-year following TKA, our results indicate that the relationship between number of  
573 modules and function changes over the time course of recovery.

574           The observed relationship between a higher number of modules and better function in some  
575 measures before TKA reversed in some measures by 24-months after TKA. The group with 2  
576 modules 24-months after surgery demonstrated 6MW distances that were on average better,  
577 statistically and clinically, than those with 3 modules. Further analysis revealed that there were 2  
578 participants with 2 modules that had significantly higher 6MW distances than the other participants  
579 at this time point which drove this result. Both participants demonstrated module organization that  
580 was different from the healthy controls, with one module that was dominated by the quadriceps  
581 and hamstrings and one module that was dominated by the plantarflexors and hamstrings such that  
582 the hamstrings were constantly active throughout the gait cycle. These participants also  
583 demonstrated better-than-average SCT and TUG performance at 24-months but had unremarkable  
584 KOOS scores and demographics measures. When examining all participants at 24-months post-  
585 TKA, we found that 3 of the 5 participants (60.0%) with 2 modules had proper organization while  
586 only 3 of the 8 participants (37.5%) with 3 modules had proper organization. These results indicate  
587 that module organization, rather than number, may be a factor which is related to function in the  
588 long-term post-operative time frame (24-months after TKA).

589           Though there were no statistically significant differences in function between the proper  
590 and poor organization groups at any time point, we observed trends toward better function in all  
591 functional measures, except TUG, for the group with proper module organization at 24-months  
592 after TKA. While the number of modules has frequently been used as a metric for motor control,  
593 recent studies suggest that module analysis which examines the composition of modules across  
594 multiple trials may provide further insight into functional performance in tasks like walking (22).  
595 Furthermore, relationships between module organization and function have been observed in  
596 populations with neurologic movement disorders. Brough et al. (49) found that individuals with

597 post-stroke hemiparesis without an independent plantarflexors module demonstrated poorer  
598 locomotor function compared to patients and controls with an independent plantarflexors module.  
599 Hayes et al. (25) also observed altered module composition and slower walking speeds in  
600 individuals with chronic incomplete spinal cord injury compared to able-bodied individuals. While  
601 there was not a significant relationship in the current study between function and module  
602 organization, as it relates to the organization of healthy individuals, the observed trends toward  
603 better function in those with module organization similar to healthy controls, with several  
604 measures presenting with clinically meaningful differences between groups, indicates that there  
605 may be a relationship between module composition and function which should be explored further.

606 Investigation of the number and organization of modules over time revealed that  
607 neuromuscular control was plastic in individual participants, and this neuroplasticity may be  
608 related to functional outcomes. Previously, Hubley-Kozey et al. (15) found that shifts in activation  
609 patterns of some muscles from before surgery to 1-year after TKA were accompanied by  
610 improvements in knee flexor and extensor strength and patient-reported outcomes (via WOMAC  
611 Index (50)) but were still statistically different from the patterns of asymptomatic individuals. In  
612 the present study, we observed statistically significant and clinically meaningful improvements in  
613 all functional measures from before to after surgery which accompanied population-mean  
614 decreases in several tVAF measures. While small sample sizes ( $n < 10$  present at all time points)  
615 prevented us from using statistical analysis to assess the association between changes in function  
616 and changes in module characteristics between time points, these results suggest that there may be  
617 an underlying relationship between improvements in function and increased module complexity.  
618 Further, when comparing function at 6- to 24-months, there was a larger improvement in all  
619 functional measures for groups with proper organization than those with poor organization, with

620 the exception of TUG (Table 3). This observation may indicate that individuals with proper module  
621 organization may have a greater capacity to improve function than those with poor organization.  
622 Though we were not able to characterize it in the present study, we believe these observations  
623 suggest that there is a relationship between changes in function and changes in modular control  
624 which should be investigated in future studies.

625 Our evidence that the neuromuscular control strategies adopted before surgery are not  
626 permanent suggests that surgical intervention and rehabilitation have an influence on modular  
627 control strategy. These results contrast Shuman et al. (51) who found no change in the distribution  
628 of muscle weightings within modules after treatment in children with cerebral palsy. However,  
629 while the present study focuses on an orthopaedic condition rather than a neurological disorder,  
630 our results support the concepts presented by Ting et al. (30), who suggested that neuromuscular  
631 control patterns can be influenced by rehabilitation in individuals with spinal cord injury, stroke,  
632 and Parkinson's disease. Our results also support the findings of Roelker et al. (42) who found  
633 differences in motor modules between individuals with KOA and healthy, age-matched controls,  
634 indicating that the onset of KOA may alter neuromuscular control strategy. It remains unclear  
635 whether the changes in neural control observed in the present study resulted from changes in  
636 neuroanatomical structures (i.e. muscles, motor units, or even spinal/supraspinal structures) or are  
637 products of the neuromechanical interactions (30) caused by changes in the mechanical  
638 environment of the knee during surgery. Further, while some subjects presented increases in the  
639 number of modules or improvements in module organization over the time course of recovery,  
640 several participants decreased in number or worsened in organization (Table 4). These results may  
641 indicate that there may exist a neuromuscular control pattern, different from that of healthy older  
642 adults, which is more optimal for patients following TKA. Further investigation is needed to

643 characterize “optimal control” in this population. Nonetheless, while we did not collect detailed  
644 data on the rehabilitation plans of the participants in the present pilot study, our results suggest  
645 that changes in neuromuscular control strategies, explored through motor modules, occur  
646 throughout the treatment and rehabilitation of an orthopaedic condition.

647         The plasticity of control in this population and the association between modular control  
648 and patient function at individual time points may provide a basis for modifying rehabilitation  
649 programs to improve functional outcomes after TKA. The association between better function and  
650 a higher number of modules before and 6-months after surgery and trends toward better average  
651 function in those with proper organization 24-months after surgery suggests that the relationships  
652 between function and module number or organization may be uncoupled. Our results before and  
653 6-months after TKA support the findings of others, who have suggested that higher modular  
654 complexity indicates a higher number of independent motor strategies that can be used to complete  
655 a task (21, 52), thus improving adaptability and function. Our work suggests that improvements in  
656 function in TKA patients may initially present as increases in the number of modules recruited  
657 during gait and that once individuals are capable of producing complex and discrete neuromuscular  
658 control patterns, further functional improvements may present as improvements in module  
659 organization. Further investigation is needed to determine the cause of the observed changes in  
660 modular control. The findings of this future work will help to determine if such motor control  
661 changes may be driven through rehabilitation programs in order to improve patient function.

662         This pilot study was based on a retrospective analysis of EMG data collected in a separate  
663 study, and as such, presented several limitations. Small sample sizes, particularly at the 24-month  
664 time point, may have prevented us from observing greater associations between modular control  
665 characteristics and function. The high BMI values, which are representative of the general TKA

666 population, resulted in increased motion artifact during EMG collection and also limited the  
667 number of available trials for analysis. Further investigation is necessary to further characterize  
668 the relationship between changes in modular control characteristics and changes in function at the  
669 population level. A larger study may provide the statistical power needed to detect potential  
670 associations between modular complexity and functional outcomes. Additionally, EMGs were  
671 recorded from several muscles with similar functions (i.e., medial and lateral gastrocnemii, medial  
672 and lateral vasti) as a part of the original study design. This prevented us from analyzing modules  
673 involving other muscles that are important in gait (i.e., tibialis anterior, gluteus muscles). Given  
674 that the available EMG was collected from 3 groups of muscles with similar function (quadriceps,  
675 hamstrings, and plantarflexors), it seems appropriate that the maximum number of modules found  
676 was 3, with each typically dominated by the quadriceps, hamstrings, or plantarflexors. As a result,  
677 there was limited variation observed in the number of modules and our observations of modular  
678 control in this population were limited to these muscles. In future module studies, we plan to record  
679 a more diverse set of muscles.

680

## 681 **Conclusions**

682 Some performance-based and patient-reported functional measures were related to  
683 modular complexity and organization. The number and organization of modules in individuals  
684 changed between the three testing time points in our study. We believe this new approach to  
685 evaluating motor control in individuals with TKA provides valuable insight into the plasticity of  
686 neural control strategies in patients and may help inform rehabilitation programs for patients  
687 demonstrating unsatisfactory outcomes. Future work will build on the findings of this pilot study

688 and explore the influence of rehabilitation techniques, which target re-training neuromuscular  
689 control, on functional outcomes.

690

## 691 **Acknowledgments**

692 The authors thank Dr. Jacqueline M. Lewis, Dr. Gregory M. Freisinger, Dr. Elena J. Caruthers,  
693 Rachel K. Hall, Elizabeth M. Leszcz, and Kathryn S. Blessinger for their contributions to data  
694 collection and processing. We also thank Drs. Jeffrey F. Granger, Andrew H. Glassman, and  
695 Matthew D. Beal, who performed the surgeries in this study, and Drs. Jason Payne and Alan  
696 Rogers, who performed the radiographic grading of OA severity.

697

## 698 **References**

- 699 1. Sloan M, Premkumar A, Sheth NP. Projected Volume of Primary Total Joint  
700 Arthroplasty in the U.S., 2014 to 2030. *J Bone Joint Surg Am.* 2018;100(17):1455-60.
- 701 2. Singh JA, O'Byrne M, Harmsen S, Lewallen D. Predictors of moderate-severe functional  
702 limitation after primary Total Knee Arthroplasty (TKA): 4701 TKAs at 2-years and 2935 TKAs  
703 at 5-years. *Osteoarthritis and cartilage.* 2010;18(4):515-21.
- 704 3. Berman AT, Zarro VJ, Bosacco SJ, Israelite C. Quantitative gait analysis after unilateral  
705 or bilateral total knee replacement. *J Bone Joint Surg Am.* 1987;69(9):1340-5.
- 706 4. Benedetti MG, Catani F, Bilotta TW, Marcacci M, Mariani E, Giannini S. Muscle  
707 activation pattern and gait biomechanics after total knee replacement. *Clinical biomechanics*  
708 (Bristol, Avon). 2003;18(9):871-6.
- 709 5. Wilson SA, McCann PD, Gotlin RS, Ramakrishnan HK, Wootten ME, Insall JN.  
710 Comprehensive gait analysis in posterior-stabilized knee arthroplasty. *J Arthroplasty.*  
711 1996;11(4):359-67.
- 712 6. Su FC, Lai KA, Hong WH. Rising from chair after total knee arthroplasty. *Clin Biomech*  
713 (Bristol, Avon). 1998;13(3):176-81.
- 714 7. Yercan HS, Ait Si Selmi T, Sugun TS, Neyret P. Tibiofemoral instability in primary total  
715 knee replacement: a review, Part 1: Basic principles and classification. *The Knee.*  
716 2005;12(4):257-66.
- 717 8. Stulberg SD, Loan P, Sarin V. Computer-assisted navigation in total knee replacement:  
718 results of an initial experience in thirty-five patients. *J Bone Joint Surg Am.* 2002;84-A Suppl  
719 2:90-8.



- 720 9. Jeffery RS, Morris RW, Denham RA. Coronal alignment after total knee replacement.  
721 The Journal of bone and joint surgery British volume. 1991;73(5):709-14.
- 722 10. Bade MJ, Kohrt WM, Stevens-Lapsley JE. Outcomes before and after total knee  
723 arthroplasty compared to healthy adults. The Journal of orthopaedic and sports physical therapy.  
724 2010;40(9):559-67.
- 725 11. Zeni JA, Jr., Snyder-Mackler L. Early postoperative measures predict 1- and 2-year  
726 outcomes after unilateral total knee arthroplasty: importance of contralateral limb strength.  
727 Physical therapy. 2010;90(1):43-54.
- 728 12. Smith AJ, Lloyd DG, Wood DJ. Pre-surgery knee joint loading patterns during walking  
729 predict the presence and severity of anterior knee pain after total knee arthroplasty. Journal of  
730 orthopaedic research : official publication of the Orthopaedic Research Society. 2004;22(2):260-  
731 6.
- 732 13. Davidson BS, Judd DL, Thomas AC, Mizner RL, Eckhoff DG, Stevens-Lapsley JE.  
733 Muscle activation and coactivation during five-time-sit-to-stand movement in patients  
734 undergoing total knee arthroplasty. J Electromyogr Kinesiol. 2013;23(6):1485-93.
- 735 14. Marmion AR, Snyder-Mackler L. Activation deficits do not limit quadriceps strength  
736 training gains in patients after total knee arthroplasty. Int J Sports Phys Ther. 2014;9(3):329-37.
- 737 15. Hubley-Kozey CL, Hatfield GL, Astephen Wilson JL, Dunbar MJ. Alterations in  
738 neuromuscular patterns between pre and one-year post-total knee arthroplasty. Clin Biomech  
739 (Bristol, Avon). 2010;25(10):995-1002.
- 740 16. Ting LH, McKay JL. Neuromechanics of muscle synergies for posture and movement.  
741 Curr Opin Neurobiol. 2007;17(6):622-8.
- 742 17. Lee WA. Neuromotor synergies as a basis for coordinated intentional action. J Mot  
743 Behav. 1984;16(2):135-70.
- 744 18. Mussa-Ivaldi FA, Giszter SF, Bizzi E. Linear combinations of primitives in vertebrate  
745 motor control. Proc Natl Acad Sci U S A. 1994;91(16):7534-8.
- 746 19. Olree KS, Vaughan CL. Fundamental patterns of bilateral muscle activity in human  
747 locomotion. Biol Cybern. 1995;73(5):409-14.
- 748 20. Ivanenko YP, Poppele RE, Lacquaniti F. Five basic muscle activation patterns account  
749 for muscle activity during human locomotion. J Physiol. 2004;556(Pt 1):267-82.
- 750 21. Ardestani MM, Malloy P, Nam D, Rosenberg AG, Wimmer MA. TKA patients with  
751 unsatisfying knee function show changes in neuromotor synergy pattern but not joint  
752 biomechanics. J Electromyogr Kinesiol. 2017;37:90-100.
- 753 22. Allen JL, McKay JL, Sawers A, Hackney ME, Ting LH. Increased neuromuscular  
754 consistency in gait and balance after partnered, dance-based rehabilitation in Parkinson's disease.  
755 J Neurophysiol. 2017;118(1):363-73.
- 756 23. Allen JL, Kesar TM, Ting LH. Motor module generalization across balance and walking  
757 is impaired after stroke. J Neurophysiol. 2019;122(1):277-89.
- 758 24. Clark DJ, Ting LH, Zajac FE, Neptune RR, Kautz SA. Merging of healthy motor  
759 modules predicts reduced locomotor performance and muscle coordination complexity post-  
760 stroke. J Neurophysiol. 2010;103(2):844-57.
- 761 25. Hayes HB, Chvatal SA, French MA, Ting LH, Trumbower RD. Neuromuscular  
762 constraints on muscle coordination during overground walking in persons with chronic  
763 incomplete spinal cord injury. Clin Neurophysiol. 2014;125(10):2024-35.



- 764 26. Lopes Ferreira C, Barroso FO, Torricelli D, Pons JL, Politti F, Lucareli PRG. Women  
765 with patellofemoral pain show altered motor coordination during lateral step down. *J Biomech.*  
766 2020;110:109981.
- 767 27. Serrancolí G, Monllau JC, Font-Llagunes JM. Analysis of muscle synergies and  
768 activation-deactivation patterns in subjects with anterior cruciate ligament deficiency during  
769 walking. *Clin Biomech (Bristol, Avon).* 2016;31:65-73.
- 770 28. Kubota K, Hanawa H, Yokoyama M, Kita S, Hirata K, Fujino T, et al. Usefulness of  
771 Muscle Synergy Analysis in Individuals With Knee Osteoarthritis During Gait. *IEEE Trans*  
772 *Neural Syst Rehabil Eng.* 2021;29:239-48.
- 773 29. Roelker SA, Koehn RR, Caruthers EJ, Schmitt LC, Chaudhari AMW, Siston RA. Effects  
774 of age and knee osteoarthritis on the modular control of walking: A pilot study. *PLoS One.*  
775 2021;16(12):e0261862.
- 776 30. Ting LH, Chiel HJ, Trumbower RD, Allen JL, McKay JL, Hackney ME, et al.  
777 Neuromechanical principles underlying movement modularity and their implications for  
778 rehabilitation. *Neuron.* 2015;86(1):38-54.
- 779 31. Freisinger GM, Hutter EE, Lewis J, Granger JF, Glassman AH, Beal MD, et al.  
780 Relationships between varus-valgus laxity of the severely osteoarthritic knee and gait, instability,  
781 clinical performance, and function. *J Orthop Res.* 2017;35(8):1644-52.
- 782 32. Chaudhari AMW, Schmitt LC, Freisinger GM, Lewis JM, Hutter EE, Pan X, et al.  
783 Perceived Instability Is Associated With Strength and Pain, Not Frontal Knee Laxity, in Patients  
784 With Advanced Knee Osteoarthritis. *J Orthop Sports Phys Ther.* 2019;49(7):513-7.
- 785 33. Kellgren JH, Lawrence JS. Radiological assessment of osteo-arthritis. *Ann Rheum Dis.*  
786 1957;16(4):494-502.
- 787 34. Rejeski WJ, Ettinger WH, Jr., Schumaker S, James P, Burns R, Elam JT. Assessing  
788 performance-related disability in patients with knee osteoarthritis. *Osteoarthritis Cartilage.*  
789 1995;3(3):157-67.
- 790 35. Dobson F, Hinman RS, Roos EM, Abbott JH, Stratford P, Davis AM, et al. OARSI  
791 recommended performance-based tests to assess physical function in people diagnosed with hip  
792 or knee osteoarthritis. *Osteoarthritis Cartilage.* 2013;21(8):1042-52.
- 793 36. Kennedy DM, Stratford PW, Wessel J, Gollish JD, Penney D. Assessing stability and  
794 change of four performance measures: a longitudinal study evaluating outcome following total  
795 hip and knee arthroplasty. *BMC Musculoskelet Disord.* 2005;6:3.
- 796 37. Roos EM, Lohmander LS. The Knee injury and Osteoarthritis Outcome Score (KOOS):  
797 from joint injury to osteoarthritis. *Health Qual Life Outcomes.* 2003;1:64.
- 798 38. Kieliba P, Tropea P, Pirondini E, Coscia M, Micera S, Artoni F. How are Muscle  
799 Synergies Affected by Electromyography Pre-Processing? *IEEE Trans Neural Syst Rehabil Eng.*  
800 2018;26(4):882-93.
- 801 39. Santuz A, Ekizos A, Janshen L, Baltzopoulos V, Arampatzis A. On the Methodological  
802 Implications of Extracting Muscle Synergies from Human Locomotion. *Int J Neural Syst.*  
803 2017;27(5):1750007.
- 804 40. Torres-Oviedo G, Ting LH. Muscle synergies characterizing human postural responses. *J*  
805 *Neurophysiol.* 2007;98(4):2144-56.
- 806 41. Lee DD, Seung HS. Learning the parts of objects by non-negative matrix factorization.  
807 *Nature.* 1999;401(6755):788-91.

- 808 42. Roelker SA, Koehn RR, Caruthers EJ, Schmitt LC, Chaudhari AMW, Siston RA. Effects  
809 of Age and Knee Osteoarthritis on the Modular Control of Walking: A Pilot Study. medRxiv.  
810 2021:2020.05.22.20110536.
- 811 43. Almeida GJ, Schroeder CA, Gil AB, Fitzgerald GK, Piva SR. Interrater reliability and  
812 validity of the stair ascend/descend test in subjects with total knee arthroplasty. Arch Phys Med  
813 Rehabil. 2010;91(6):932-8.
- 814 44. Steele KM, Rozumalski A, Schwartz MH. Muscle synergies and complexity of  
815 neuromuscular control during gait in cerebral palsy. Dev Med Child Neurol. 2015;57(12):1176-  
816 82.
- 817 45. Jacobs DA, Koller JR, Steele KM, Ferris DP. Motor modules during adaptation to  
818 walking in a powered ankle exoskeleton. J Neuroeng Rehabil. 2018;15(1):2.
- 819 46. Shuman BR, Goudriaan M, Desloovere K, Schwartz MH, Steele KM. Associations  
820 Between Muscle Synergies and Treatment Outcomes in Cerebral Palsy Are Robust Across  
821 Clinical Centers. Arch Phys Med Rehabil. 2018;99(11):2175-82.
- 822 47. Weiss JM, Noble PC, Conditt MA, Kohl HW, Roberts S, Cook KF, et al. What functional  
823 activities are important to patients with knee replacements? Clin Orthop Relat Res.  
824 2002(404):172-88.
- 825 48. Sawers A, Allen JL, Ting LH. Long-term training modifies the modular structure and  
826 organization of walking balance control. J Neurophysiol. 2015;114(6):3359-73.
- 827 49. Brough LG, Kautz SA, Bowden MG, Gregory CM, Neptune RR. Merged plantarflexor  
828 muscle activity is predictive of poor walking performance in post-stroke hemiparetic subjects. J  
829 Biomech. 2019;82:361-7.
- 830 50. Bellamy N, Buchanan WW, Goldsmith CH, Campbell J, Stitt LW. Validation study of  
831 WOMAC: a health status instrument for measuring clinically important patient relevant  
832 outcomes to antirheumatic drug therapy in patients with osteoarthritis of the hip or knee. J  
833 Rheumatol. 1988;15(12):1833-40.
- 834 51. Shuman BR, Goudriaan M, Desloovere K, Schwartz MH, Steele KM. Muscle synergies  
835 demonstrate only minimal changes after treatment in cerebral palsy. J Neuroeng Rehabil.  
836 2019;16(1):46.
- 837 52. Safavynia SA, Torres-Oviedo G, Ting LH. Muscle Synergies: Implications for Clinical  
838 Evaluation and Rehabilitation of Movement. Top Spinal Cord Inj Rehabil. 2011;17(1):16-24.  
839
